# Supplementary material for: Neonatal Gene Therapy for Hemophilia B by a Novel Adenovirus Vector Showing Reduced Leaky Expression of Viral Genes
Source: Mol Ther Methods Clin Dev. 2017 Jul 8;6:183–93. doi: 10.1016/j.omtm.2017.07.001 (PMC5552065; doi:10.1016/j.omtm.2017.07.001)
Supplement: Document S1. Supplemental Materials and Methods, Figures S1–S10, and Table S1 [file mmc1.pdf]

**OMTM, Volume 6**

## **Supplemental Information**

### **Neonatal Gene Therapy for Hemophilia B by a Novel Adenovirus Vector Showing Reduced Leaky Expression of Viral Genes**

**Shunsuke Iizuka, Fuminori Sakurai, Masashi Tachibana, Kazuo Ohashi, and Hiroyuki Mizuguchi**

## 1    **Supplementary materials and methods**

### 3    **Analysis of serum hepatotoxicity marker**

4        Blood samples were collected and centrifuged (4°C, 7,000 g, 15 min) to obtain the serum. The  
5        serum aspartateaminotransferase (AST) levels were determined using a transaminase-CII kit (Wako  
6        Pure Chemical).

### 8    **Real-time RT PCR analysis**

9        Total RNA was extracted from the liver and spleen using ISOGEN (Wako Pure Chemical, Osaka,  
10        Japan). mRNA levels of cytokines, including interleukin-(IL-) 6, IL-12, interferon (IFN) - $\gamma$ , and  
11        glyceraldehyde-3-phosphatedehydrogenase (GAPDH), and albumin were determined by real-time  
12        RT-PCR using THUNDERBIRD SYBR qPCR Mix (Toyobo, Osaka, Japan), as previously described  
13        [1].

### 15   **Detection of anti-Ad antibody**

16        Ad-AHAmSEAP and Ad-E4-122aT-AHAmSEAP were administered to neonatal mice *via* the  
17        retro-orbital sinus. On day 42 after the 1st injection, Ad vectors were sequentially administered *via*  
18        the tail vein. Serum samples were collected as described above on day 56 following neonatal  
19        administration. Anti-Ad antibody titers were determined by ELISA as previously described [2]. 96-  
20        well immune-plate (Thermo Fisher Scientific, Waltham, MA) was pre-coated with  $5 \times 10^8$  vp of Ad-  
21        null/well. Serum samples were diluted to 1:2,560.

### 23   **Analysis of Hexon specific CTL responses**

24        Ad-AHAmSEAP and Ad-E4-122aT-AHAmSEAP were administered to neonatal mice *via* the  
25        retro-orbital sinus. On day 42 after the 1st injection, Ad vectors were sequentially administered *via*  
26        the tail vein. Splenocytes were harvested on day 56 following 1st injection. Ad hexon specific CTLs  
27        in the splenocytes were examined using a Cytofix/CytoPerm Plus kit (BD Biosciences, San Diego,  
28        CA). Briefly,  $2 \times 10^6$  splenocytes were cultured with Ad hexon peptide pool (Milteny Biotec, Bergisch  
29        Gladbach, Germany), co-stimulation antibody (anti-mouse CD28 and CD49d; eBioscience, San  
30        Diego, CA) and GolgiStop (BD Biosciences) in RPMI-1640 (Sigma-Aldrich, St. Louis, MO). Six  
31        hours after incubation, splenocytes were stained for viability using Live/ Dead Fixable Dead Cell  
32        Stain Kits (Invitrogen, Carlsbad, CA) for 30 min at room temperature. Following incubation and  
33        washing with PBS, splenocytes were stained with phycoerythrin (PE)-conjugated anti-mouse CD3 $\epsilon$   
34        antibody (eBioscience) and allophycocyanin (APC)-Cy7-conjugated anti-mouse CD8 antibody  
35        (Biolegend, San Diego, CA) for 30 min at 4°C. After incubation and washing with PBS, splenocytes  
36        were incubated in Cytofix/Cytoperm solution for 30 min at 4°C for permeabilization and stained with  
37        PE-Cy7-conjugated anti-mouse interferon (IFN)- $\gamma$  antibody (eBioscience). Data were analyzed using  
38        FlowJo software (TreeStar, Ashland, OR).

39

## Supplementary references

- [1] S. Iizuka, F. Sakurai, K. Shimizu, K. Ohashi, S.-I. Nakamura, M. Tachibana, H. Mizuguchi, Evaluation of transduction properties of an adenovirus vector in neonatal mice, *Biomed Res. Int.* 2015 (2015). doi:10.1155/2015/685374.
- [2] K. Shimizu, F. Sakurai, K. Tomita, Y. Nagamoto, S. Nakamura, K. Katayama, M. Tachibana, K. Kawabata, H. Mizuguchi, Suppression of leaky expression of adenovirus genes by insertion of microRNA-targeted sequences in the replication-incompetent adenovirus vector genome, *Mol. Ther. — Methods Clin. Dev.* 1 (2014) 14035. doi:10.1038/mtm.2014.35.

# Figure S1

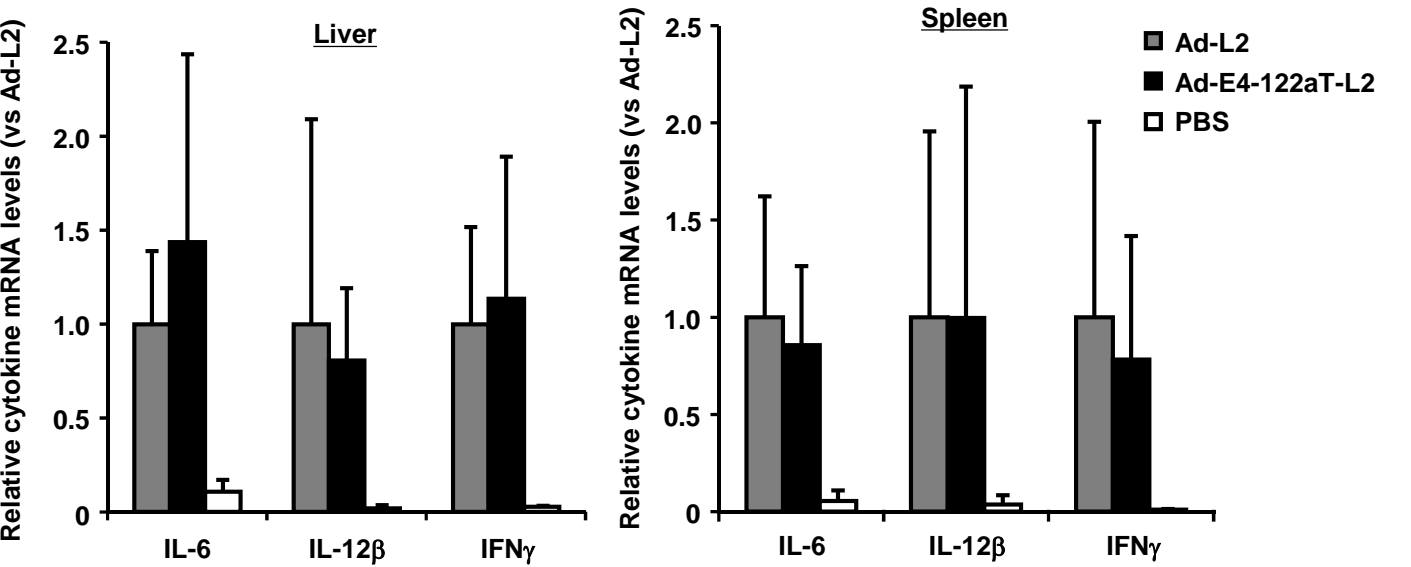

**Figure S1. Innate immune responses in the neonatal liver and spleen following systemic administration of Ad vectors.** Neonatal mice were administered Ad vectors at a dose of  $5.9 \times 10^{11}$  IFU/kg *via* the retro-orbital sinus. The liver and spleen were collected 6 h after Ad vector administration to recover total RNA. All values were normalized to 1 by the data from the Ad-L2-injected group. Results are shown as the averages  $\pm$  S.D. (n=5-6).

Figure S2

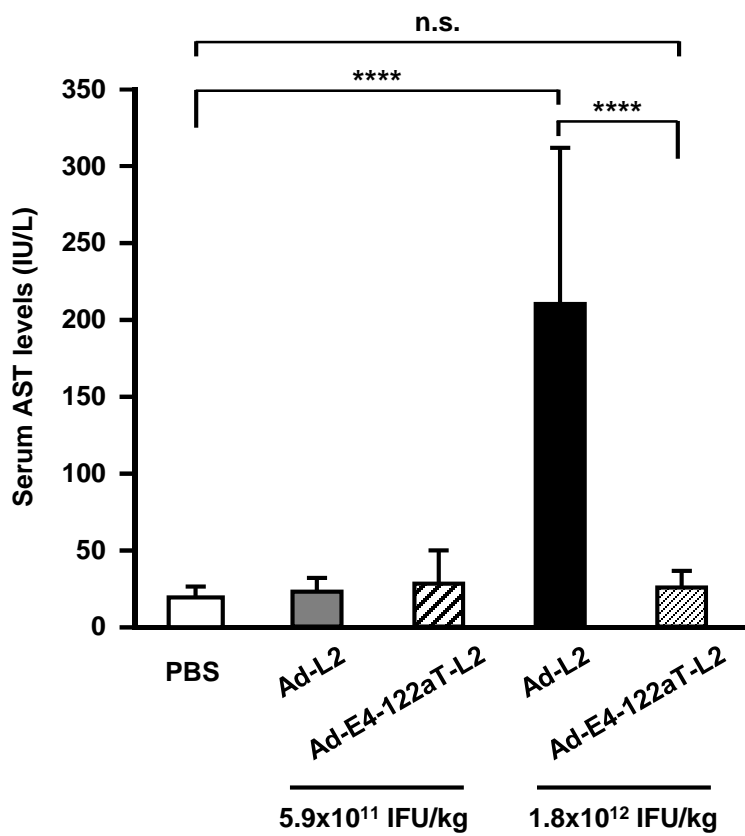

**Figure S2. Serum AST levels following Ad vector administration in neonatal mice.** Neonatal mice were administered Ad vectors at a dose of 5.9x10<sup>11</sup> IFU/kg or 1.8x10<sup>12</sup> IFU/kg *via* the retro-orbital sinus. On day 2 following Ad vector administration, serum AST levels were measured. Results are shown as the averages ± S.D. (n=7-8). AST, aspartate aminotransferase; n.s., not significant. \*\*\*\**p* < 0.0001.

Figure S3

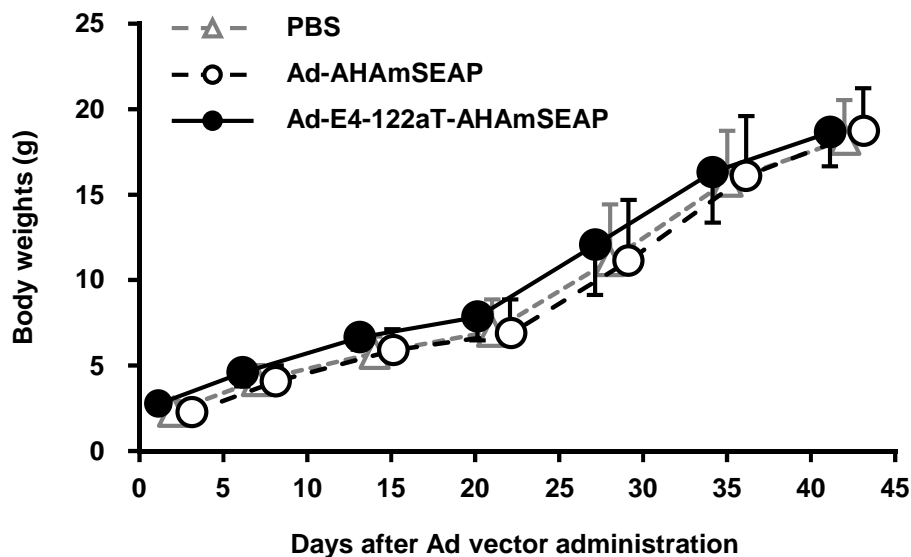

**Figure S3. Mouse body weights following Ad vector administration in neonatal mice.** Neonatal mice were administered Ad vectors at a dose of  $5.9 \times 10^{11}$  IFU/kg *via* the retro-orbital sinus. Body weights were measured at the indicated time points. Results are shown as the averages  $\pm$  S.D. (n=7-8).

Figure S4

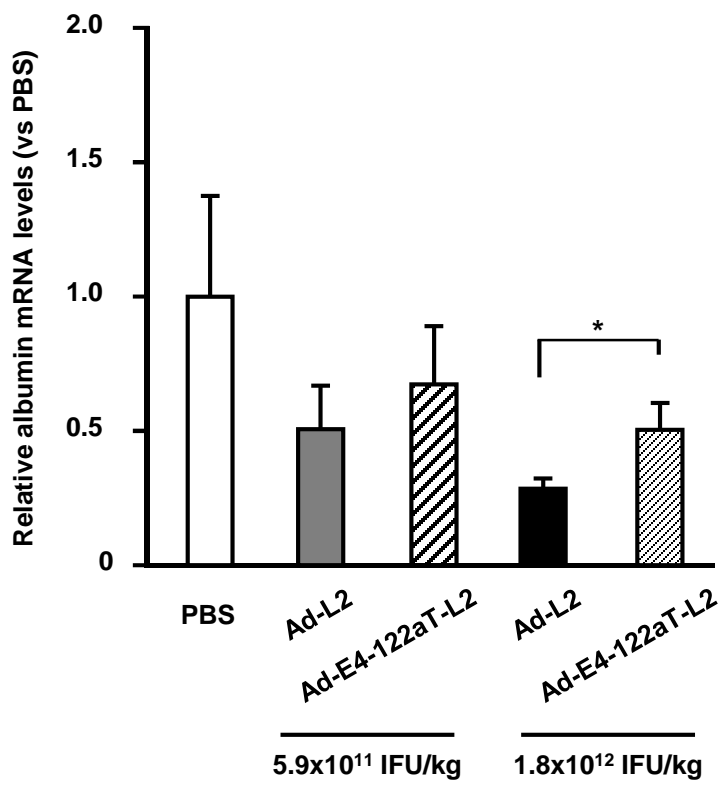

**Figure S4. Endogenous albumin expression levels in the neonatal liver following systemic administration of Ad vectors.** Neonatal mice were administered Ad vectors at a dose of 5.9x10<sup>11</sup> IFU/kg or 1.8x10<sup>12</sup> IFU/kg *via* the retro-orbital sinus. The liver was harvested to recover total RNA on day 2 following Ad vector administration. Endogenous albumin expression levels were measured by real-time RT-PCR. All values were normalized to 1 by the data from the PBS-injected group. Results are shown as the averages ± S.D. (n=6). n.s., not significant. \**p* < 0.05. \*\**p* < 0.01.

# Table S1

Table S1. Viability of neonatal mice following systemic administration of high doses of Ad vectors.

| <i>Injection titer</i>      | <i>Ad vector</i> | <i>Number of injected mice</i> | <i>Number of dead mice</i> | <i>Viability</i> |
|-----------------------------|------------------|--------------------------------|----------------------------|------------------|
| 1.8x10 <sup>12</sup> IFU/kg | Ad-L2            | 9                              | 2                          | 77.8%            |
|                             | Ad-E4-122aT-L2   | 9                              | 0                          | 100%             |
| 2.9x10 <sup>12</sup> IFU/kg | Ad-L2            | 6                              | 3                          | 50%              |
|                             | Ad-E4-122aT-L2   | 6                              | 0                          | 100%             |

Neonatal mice were administered Ad vectors at a dose of 1.8x10<sup>12</sup> IFU/kg or 2.9x10<sup>12</sup> IFU/kg *via* the retro-orbital sinus. Two days after transduction, viabilities of mice were examined.

# Figure S5

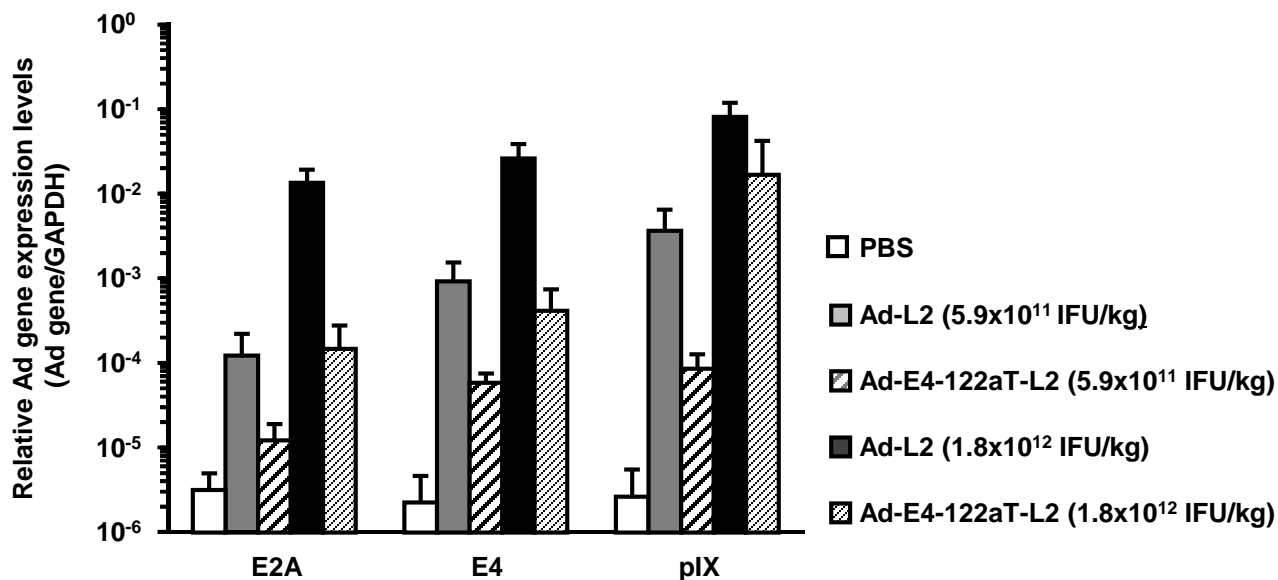

**Figure S5. Leaky expression of Ad genes in the neonatal mouse liver following systemic administration of Ad vectors.** Neonatal mice were administered Ad vectors at a dose of  $5.9 \times 10^{11}$  IFU/kg or  $1.8 \times 10^{12}$  IFU/kg *via* the retro-orbital sinus. Two days after transduction, the Ad gene expression levels in the liver were determined by real-time RT-PCR. Results are shown as the averages  $\pm$  S.D. (n=5-6).

Figure S6

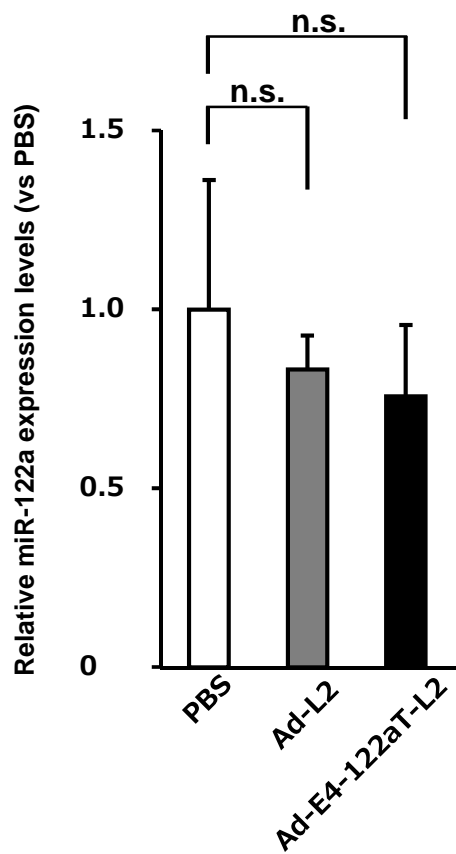

**Figure S6. miR-122a expression levels in the neonatal liver following systemic administration of Ad vectors.** Neonatal mice were administered Ad vectors at a dose of  $5.9 \times 10^{11}$  IFU/kg *via* the retro-orbital sinus. The liver was harvested to recover total RNA on day 2 following Ad vector administration. miR-122a expression levels were measured by real-time RT-PCR. All values were normalized to 1 by the data from the PBS-injected group. Results are shown as the averages  $\pm$  S.D. (n=6). n.s., not significant.

# Figure S7

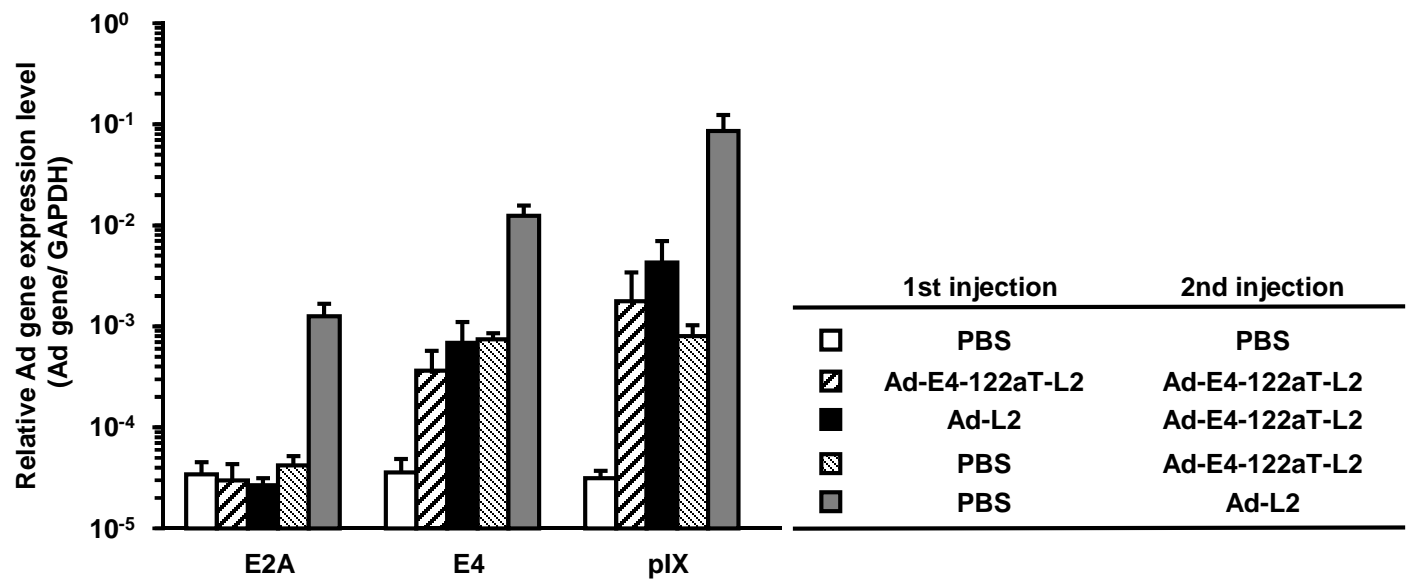

**Figure S7. Leaky expression of Ad genes in the liver following sequential administration of Ad vectors.** Neonatal mice were administered Ad vectors at a dose of  $5.9 \times 10^{11}$  IFU/kg *via* the retro-orbital sinus on day 0 and *via* the tail vein on day 42. The liver was collected to recover total RNA on day 44 following neonatal injection. Ad gene expression levels were determined by real-time RT-PCR. Results are shown as the averages  $\pm$  S.D. (n=5-6).

# Figure S8

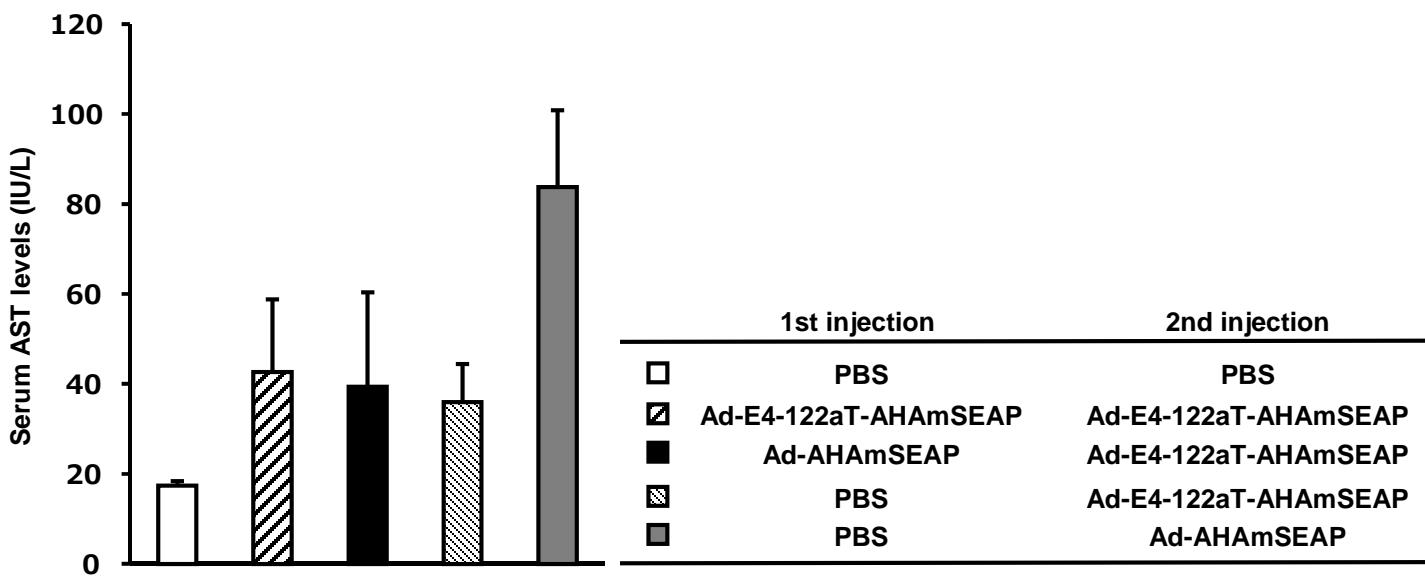

**Figure S8. Serum AST levels following sequential administration of Ad vectors.** Neonatal mice were administered Ad vectors at a dose of  $5.9 \times 10^{11}$  IFU/kg *via* the retro-orbital sinus on day 0 and *via* the tail vein on day 42. The serum was collected on day 49, followed by the measurement of serum AST levels. Results are shown as the averages  $\pm$  S.D. (n=7). AST, aspartate aminotransferase.

# Figure S9

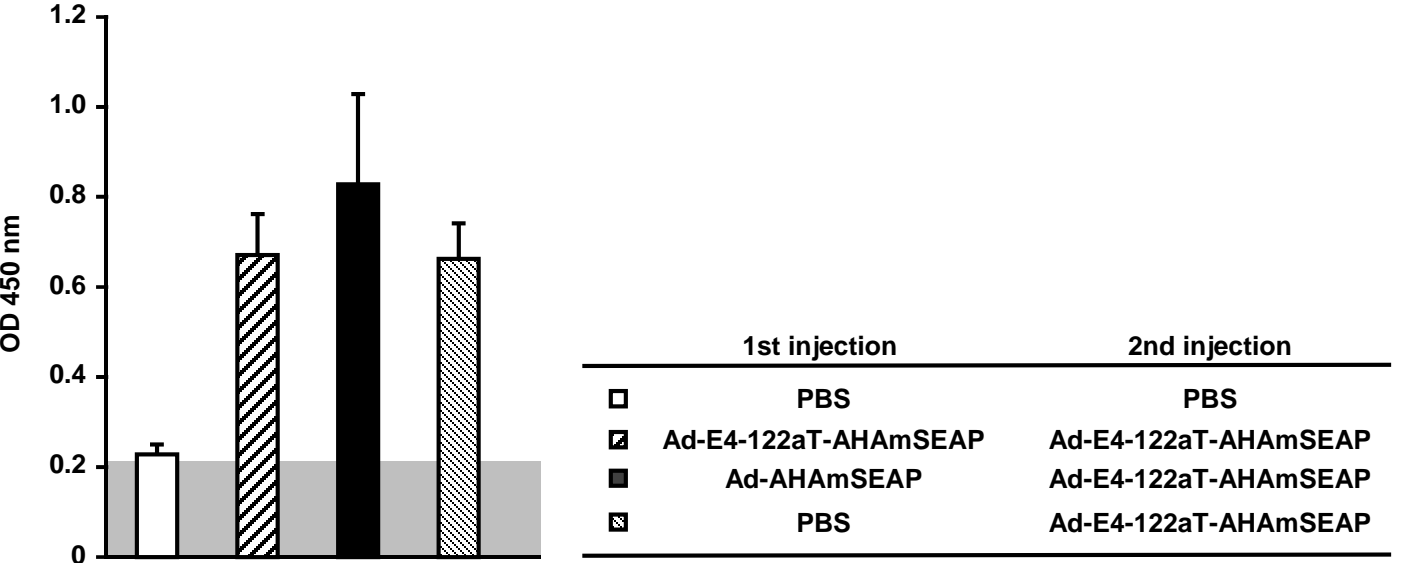

**Figure S9. Anti-Ad antibody titers in the mouse serum following sequential administration of Ad vectors.** Neonatal mice were administered Ad vectors at a dose of  $5.9 \times 10^{11}$  IFU/kg *via* the retro-orbital sinus on day 0 and *via* the tail vein on day 42. The serum were collected on day 56 following neonatal injection. Anti-Ad antibody titers were determined by ELISA. Serum samples were diluted to 1:2,560. The gray zone represents the background level. Results are shown as the averages  $\pm$  S.D. (n=7-8).

Figure S10

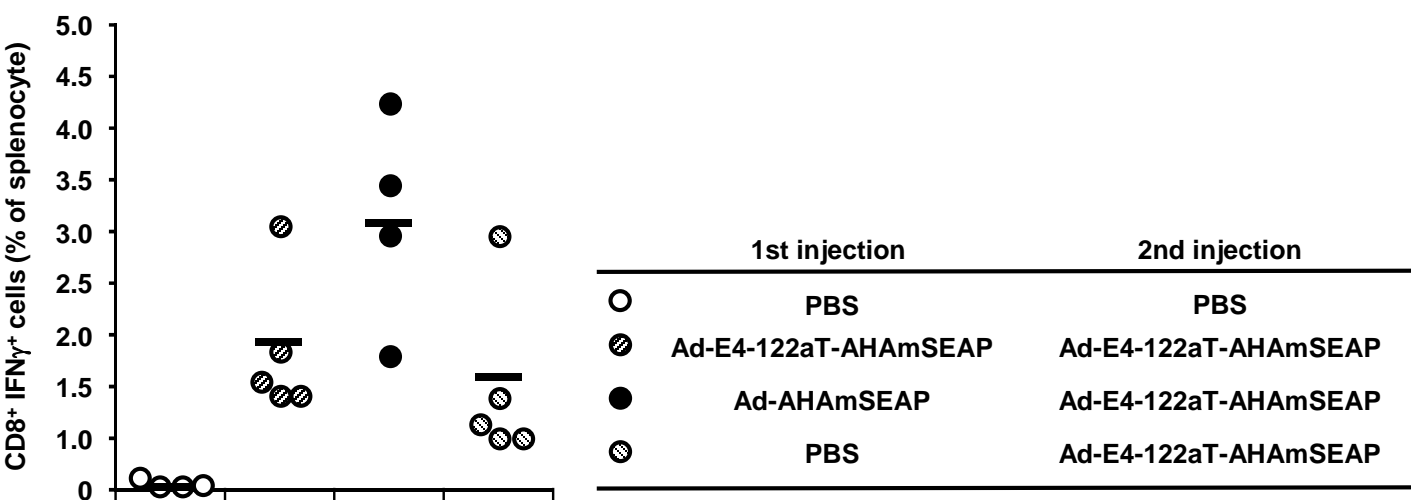

**Figure S10. Hexon-specific IFN $\gamma$ <sup>+</sup> CD8<sup>+</sup> T cells in the splenocytes following sequential administration of Ad vectors.** Neonatal mice were administered Ad vectors at a dose of  $5.9 \times 10^{11}$  IFU/kg *via* the retro-orbital sinus on day 0 and *via* the tail vein on day 42. The splenocytes were harvested on day 56 following neonatal injection and incubated with hexon peptide for 6 hours. Percentages of IFN $\gamma$ <sup>+</sup> CD8<sup>+</sup> T cells in the splenocytes were detected by FACS. Results are shown as the averages  $\pm$  S.D. (n=4-5).
